# Supplementary material for: Reversal of ApoE4-induced recycling block as a novel prevention approach for Alzheimer’s disease
Source: eLife journal article supplement (doi:10.7554/elife.40048), 2018-10-30
Supplement: supp [file elife-40048-supp-v1.zip]

Archive with 10 entries (10 files):
- elife_poa_e40048_Video_2.avi
- elife_poa_e40048_Figure_1_source_data_1.xlsx
- elife_poa_e40048_Figure_5_source_data_1.xlsx
- elife_poa_e40048_Figure_7_source_data_1.xlsx
- elife_poa_e40048_Figure_2_source_data_1.xlsx
- elife_poa_e40048_Figure_6_source_data_1.xlsx
- elife_poa_e40048_Transparent_Reporting_File.pdf
- elife_poa_e40048_Figure_4_source_data_1.xlsx
- elife_poa_e40048_Figure_8_source_data_1.xlsx
- elife_poa_e40048_Video_1.avi
