# Supplementary material for: Reversal of ApoE4-induced recycling block as a novel prevention approach for Alzheimer’s disease
Source: eLife journal article supplement (doi:10.7554/elife.40048), 2018-10-30
Supplement: supp [file elife-40048-supp-v1.zip › elife_poa_e40048_Figure_1_source_data_1.xlsx]

## Sheet: Fig1B
	E2	E3	E4
0	0.08	0.14	0.25
0.1	0.02	1.4	1.2
0.3	0.03	4.5	5.2
1	6.2	7.4	7.5
3	7.3	12.3	13.4
10	7.4	18.4	18.9
