# Supplementary material for: Reversal of ApoE4-induced recycling block as a novel prevention approach for Alzheimer’s disease
Source: eLife journal article supplement (doi:10.7554/elife.40048), 2018-10-30
Supplement: supp [file elife-40048-supp-v1.zip › elife_poa_e40048_Figure_2_source_data_1.xlsx]

## Sheet: Fig2C
	C+R			E3+R			E4+R
Lrp1	96.2	105.3	98.5	115.7	94.8	103.6	103.5	94.3	106.6
LDLR	93.1	98.2	108.7	104.1	96.2	101.6	94.1	100.7	105.2
Apoer2	103.1	96.8	100.1	82.1	73.6	76.3	32.4	27.6	20.3
IR	99.2	103.7	96.5	110.7	96.8	102.5	107.5	95.3	103.6
TfR	98.1	97.2	104.6	107.1	94.2	101.6	90.1	100.7	110.2

## Sheet: Fig2E
E3	E4
108.7	165.2
84.6	146.7
106.7	153.4

## Sheet: Fig2G
Control	Reelin	E3(3μg/ml)	E4(1μg/ml)	E4(3μg/ml)	E4(5μg/ml)
1.12	2.93	0.88	1.06	1.32	1.59
0.94	3.1	1.01	1.12	1.27	1.83
0.99	2.97	0.84	1.03	1.46	1.77
