# Supplementary material for: Reversal of ApoE4-induced recycling block as a novel prevention approach for Alzheimer’s disease
Source: eLife journal article supplement (doi:10.7554/elife.40048), 2018-10-30
Supplement: supp [file elife-40048-supp-v1.zip › elife_poa_e40048_Figure_4_source_data_1.xlsx]

## Sheet: Fig4C
Con	0	0.1	0.3	1	3
103.1	20.1	36.8	56.6	80.8	102.4
96.9	27.4	32.4	45.3	76.7	115.3
99.7	25.3	35.1	52.1	82.4	105.7

## Sheet: Fig4E
	0			1			3			10
C+R	105.1	96.3	98.7	100.5	96.8	103.9	98.1	104.2	101.5	96.5	107.2	98.6
E3+R	86.1	72.7	69.4	95.1	78.2	84.3	89.5	102.4	107.7	99.2	110.7	107.4
E4+R	22.6	30.7	25.1	67.5	79.4	73.2	113.5	92.4	117.5	106.5	98.2	105.3

## Sheet: Fig4G
C	E4	E4+EMD	E4+EMD+Baf5	E4+EMD+Baf10	E4+EMD+Baf50	E4+EMD+Baf5100
104.1	27.2	103.3	107.1	103.3	60.4	33.2
97	30.1	95.4	94.7	95.2	47.3	29.5
99.7	22.4	102.3	99.3	90.1	50.1	37.3

## Sheet: Fig4I
	0			0.1			0.3			1			3
C+R	105.1	97.2	98.4	103.5	94.1	101.3	93.7	100.4	102.2	104.1	98.3	101	93.3	104.1	102.8
E4+R	32.3	27.6	20.1	25.7	29.4	36.1	36.5	44.2	40.8	62.2	74.3	67.8	95.3	110.2	102.8
E4+R+Bal	29.5	30.9	27.8	23.3	29.5	33.8	30.4	33.1	34.2	37.1	32.9	36.5	67.3	55.2	61.1
