# Supplementary material for: Reversal of ApoE4-induced recycling block as a novel prevention approach for Alzheimer’s disease
Source: eLife journal article supplement (doi:10.7554/elife.40048), 2018-10-30
Supplement: supp [file elife-40048-supp-v1.zip › elife_poa_e40048_Figure_5_source_data_1.xlsx]

## Sheet: Fig5B
C+R	E4+R	C+R+shNHE1	E4+R+shNHE1	C+R+shNHE6(1)	E4+R+shNHE6(1)	C+R+shNHE7	E4+R+shNHE7	C+R+shNHE8	E4+R+shNHE8
105.5	21.3	102.4	24.5	93.2	106.2	103.2	30.5	105.1	30.1
96.9	30.5	96.3	28.2	102.2	96.1	90.5	23.3	97.4	23.6
97.4	27.1	98.9	29.2	97.8	100.4	96.9	28.9	99.1	26.1

## Sheet: Fig5D
C+R	E4+R	C+R+shNHE5	E4+R+shNHE5	C+R+shNHE9	E4+R+shNHE9	C+R+shNHE6(1)	E4+R+shNHE6(1)	C+R+shNHE6(2)	E4+R+shNHE6(2)	C+R+shNHE6(3)	E4+R+shNHE6(3)
105.1	32.1	101.3	25.5	101.5	33.2	103.3	104.8	97.1	102.5	96.5	90.1
96.6	22.6	96.5	29.2	97.4	25.4	102.7	98.2	99	97.7	102.2	94.5
98.5	27.4	102.4	26.1	99.8	28.3	96.5	102.5	101.6	100.4	100.4	101.5
