# Supplementary material for: Reversal of ApoE4-induced recycling block as a novel prevention approach for Alzheimer’s disease
Source: eLife journal article supplement (doi:10.7554/elife.40048), 2018-10-30
Supplement: supp [file elife-40048-supp-v1.zip › elife_poa_e40048_Figure_6_source_data_1.xlsx]

## Sheet: Fig6C
C+R	E4+R	E4+R+EMD87580	R+scramble	E4+R+scramble	E4+R+shNHE6(1)	E4+R+shNHE6(2)	E4+R+shNHE6(3)
107.2	29.4	85.4	105.5	20.1	105.2	87.4	98.6
95.5	19.3	105.1	95.1	22.5	94.1	99.3	101.2
97.3	25.5	91.5	92.4	28.6	99.2	94.1	93.2

## Sheet: Fig6D
C+R	E4+R	E4+R+EMD87580	R+scramble	E4+R+scramble	E4+R+shNHE6(1)	E4+R+shNHE6(2)	E4+R+shNHE6(3)
108.2	26.4	107.2	97.2	18.5	96.7	106.2	85.1
92.2	17.3	80.2	91.4	21.7	102.2	94.1	101.2
97.6	28.5	95.3	100.3	29.6	99.7	97.7	93.2

## Sheet: Fig6E
C+R	E4+R	E4+R+EMD87580	R+scramble	E4+R+scramble	E4+R+shNHE6(1)	E4+R+shNHE6(2)	E4+R+shNHE6(3)
104.4	32.6	104.5	99.2	18.5	97.4	103.2	90.1
95.3	25.9	86.2	93.4	22.7	105.2	94.6	105.2
100.2	28.9	90.3	103.3	27.6	99	97.6	97.2

## Sheet: Fig6F
C+R	E4+R	E4+R+EMD87580	R+scramble	E4+R+scramble	E4+R+shNHE6(1)	E4+R+shNHE6(2)	E4+R+shNHE6(3)
103.2	27.4	102.2	96.2	33.7	103.5	103.2	90.1
97.3	33.1	89.2	95.4	19.8	96.4	92.3	99.4
99.5	21.9	94.3	107.3	26.6	100.1	101.7	95.1
