# Supplementary material for: Reversal of ApoE4-induced recycling block as a novel prevention approach for Alzheimer’s disease
Source: eLife journal article supplement (doi:10.7554/elife.40048), 2018-10-30
Supplement: supp [file elife-40048-supp-v1.zip › elife_poa_e40048_Figure_7_source_data_1.xlsx]

## Sheet: Fig7A
		ApoE3 Control			ApoE3 + EMD87850			ApoE3 + Reelin			ApoE3 + R + EMD87580
X	Err. Bar	Mean	SEM	N	Mean	SEM	N	Mean	SEM	N	Mean	SEM	N
0.0278175	0.00397544	0.147049	0.0666368	2
0.0738237	0.00638737	0.348474	0.0992479	6
0.129766	0.00393942	0.33963	0.0930762	6
0.173669	0.0037321	0.474829	0.098178	8
0.22513	0.00389622	0.461084	0.109842	6
0.268835	0.00405353	0.534128	0.144165	7
0.323456	0	0.4442	0	1
0.3702	0.00460674	0.698041	0.220345	5
0.465921	0.0050614	0.396164	0.178903	2
0.535684	0	0.2324	0	1
0.676175	0.00368422	0.357812	0.165788	2
0.711807	0	0.234424	0	1
0.898246	0	0.286333	0	1
0.0218677	0.00210302				0.220297	0.0826826	4
0.0764619	0.00564198				0.322621	0.0708863	7
0.120366	0.00432391				0.38598	0.0927254	4
0.175137	0.00505				0.33416	0.101773	4
0.21984	0.00351634				0.427474	0.0628542	6
0.279681	0.00558042				0.58217	0.121876	5
0.329635	0.00144209				0.605968	0.225265	2
0.371536	0				0.398342	0	1
0.426234	0.0140117				0.448021	0.0944935	2
0.455439	0				1.05787	0	1
0.544596	0				0.605486	0	1
0.567158	0				1.0228	0	1
0.620281	0				0.6	0	1
0.0287394	0.00449894							0.214092	0.0485757	5
0.0781556	0.00294646							0.269637	0.0336275	9
0.120699	0.0046772							0.366701	0.0363068	8
0.173467	0.00267587							0.442986	0.0624798	9
0.213594	0.0022713							0.381725	0.0883086	5
0.281434	0.000337728							0.310157	0.280605	2
0.315149	0.0090263							0.345331	0.251736	2
0.367914	0.00380641							0.645994	0.199614	4
0.416439	0.00728069							0.892519	0.072281	2
0.491404	0							0.906667	0	1
0.620509	0							1.31252	0	1
0.0323433	0.00252524										0.262432	0.051304	7
0.0779472	0.00369826										0.325266	0.0406888	10
0.128576	0.00403313										0.427526	0.0552194	8
0.17003	0.00577001										0.608359	0.121272	6
0.216763	0.00278071										0.55931	0.0469286	2
0.272947	0.00831578										0.548332	0.134395	2
0.314357	0.00751613										0.650116	0.0236189	3
0.379465	0.00873278										0.84575	0.0569643	2
0.42148	0.00945412										0.861952	0.131238	2
0.516965	0										0.868952	0	1
0.570298	0										0.784095	0	1

## Sheet: Fig7B
		ApoE4 Control			ApoE4 + EMD87850			ApoE4 + Reelin			ApoE4 + R + EMD87580
X	Err. Bar	Mean	SEM	N	Mean	SEM	N	Mean	SEM	N	Mean	SEM	N
0.165979	0.0239555	0.615848	0.123019	14
0.0363512	0.00363471	0.183404	0.0407539	8
0.0772556	0.00274616	0.244031	0.0561615	10
0.124469	0.00309862	0.290278	0.0426069	12
0.168974	0.003187	0.376613	0.0711295	11
0.215091	0.00276584	0.44738	0.0895991	10
0.264061	0.00506049	0.458028	0.0802573	7
0.320014	0.00656297	0.613352	0.199165	5
0.368134	0.00188315	1.12719	0.384838	3
0.431746	0.00970915	0.634116	0.148943	4
0.473	0.0204035	0.853855	0.588691	2
0.509614	0	0.686587	0	1
0.585632	0	0.283291	0	1
0.638991	0.0108684	1.14073	0.815673	2
0.673789	0	0.353527	0	1
0.121593	0.0197539				0.343378	0.0590594	14
0.0290842	0.00766055				0.204877	0.0712598	5
0.0796398	0.0035935				0.25498	0.0421847	11
0.121595	0.00174969				0.295627	0.033175	13
0.173556	0.00296908				0.394489	0.0540838	14
0.229215	0.00406232				0.456117	0.0863202	9
0.266696	0.00397715				0.521793	0.0904339	9
0.309747	0.00220388				0.528598	0.10166	6
0.368044	0				0.583	0	1
0.419224	0.0068484				0.637718	0.0635985	4
0.493763	0.00100878				0.455443	0.175592	2
0.592667	0.00163156				0.797506	0.0407792	2
0.732895	0				0.899467	0	1
0.167991	0.0250807							0.432566	0.0460981	16
0.0324846	0.00465618							0.255592	0.150066	3
0.0816912	0.00253851							0.335473	0.0588773	7
0.122852	0.00377349							0.295651	0.0410423	11
0.178167	0.00371387							0.288547	0.0454388	13
0.222749	0.0027343							0.379103	0.0878095	11
0.273951	0.00280403							0.440638	0.0546857	11
0.324276	0.0032334							0.627149	0.198	6
0.370268	0.00390341							0.485463	0.0861507	8
0.425285	0.00805567							0.469222	0.0984495	4
0.463392	0.00394651							0.512339	0.107084	3
0.558216	0.00721683							0.548794	0.00810301	2
0.61336	0.00592107							0.684091	0.115873	2
0.684439	0							0.390524	0	1
0.123978	0.015375										0.390609	0.0706	16
0.029945	0.00392075										0.153556	0.0439383	6
0.0807063	0.00280654										0.210495	0.028044	13
0.124679	0.00305302										0.248658	0.0250903	15
0.173848	0.00258459										0.313087	0.0337682	14
0.225399	0.00292856										0.396197	0.0510296	13
0.274101	0.00410807										0.392846	0.0615616	9
0.323694	0.00793417										0.453311	0.104639	6
0.371368	0.00661511										0.66229	0.0934831	5
0.410073	0.0079529										0.634251	0.162011	3
0.453456	0										0.591413	0	1
0.526661	0.00240938										0.85646	0.302926	2
0.573632	0										0.491533	0	1

## Sheet: Fig7C
		ApoE3						NHEI APoE3							Control with Reelin						NHEI treated w Reelin
-20	-20	1.03288	0.876814	0.898609	0.972372	0.892215	0.904172	0.702976	0.964912	1.20589	0.948153	0.994131	0.697021	0.943605	0.939036		0.960353	0.751553	0.960381	0.747036	0.913655	0.946398	0.819225	0.996858	0.467269	0.887129	0.802613	0.961377
-19.5	-19.5	1.01109	0.970092	0.994643	1.09068	0.925166	0.995644	1.32375	1.03045	1.13242	0.938005	1.19589	1.00979	0.869758	0.880711	1.2796	0.946278	0.863354	0.96285	0.846315	0.898971	0.865885	0.939167	1.04849	0.836468	0.938614	0.84223	0.980461
-19	-19	1.02272	0.903761	0.986411	1.00154	0.917562	1.04138	1.00202	1.24892	1.23783	0.951053	0.931768	1.31362	1.01745	0.848632	1.0981	0.957105	0.803313	0.878909	0.797489	0.957706	0.90842	1.11342	0.968172	0.59995	0.928713	0.817286	1.10451
-18.5	-18.5	1.01981	0.874741	1.08107	1.04368	0.877007	1.09064	0.955254	0.855677	1.09728	1.07283	1.2069	0.965106	0.9354	0.813637	1.12532	0.972262	0.712215	0.906066	0.734015	0.934864	0.859809	1.07156	1.02411	0.715325	0.90099	0.852501	0.913666
-18	-18	0.951532	0.926562	0.932906	1.00479	0.84659	0.802144	0.996355	0.994042	1.17554	0.949603	0.909758	1.65319	0.823261	1.00611	1.22515	1.0015	0.797101	0.911004	0.83655	1.02134	0.914497	1.01611	1.01981	0.78455	0.938614	0.881847	0.980461
-17.5	-17.5	1.02417	0.914125	1.06324	1.02423	0.935305	0.693081	0.788014	1.16154	1.27297	0.96845	0.95011	2.03298	0.804116	0.857381	1.29775	0.95927	0.813665	0.967787	0.776331	0.931601	0.85829	0.77849	1.03558	0.605719	0.994059	0.905324	0.99716
-17	-17	0.957343	0.957655	1.07696	0.995061	0.866868	1.02027	1.12249	1.20159	1.15318	0.83797	0.964784	0.857872	0.812321	0.743647	1.28868	0.976593	0.712215	0.802375	0.909788	0.990336	0.97678	1.05685	1.08005	0.698019	0.821782	0.851034	0.925594
-16.5	-16.5	0.973323	1.0074	1.0015	1.15226	0.894749	0.893617	1.11116	1.15425	1.15797	0.866966	0.97212	1.29574	0.853347	0.860297	1.29775	0.938699	0.811594	1.03445	0.828412	0.928338	0.900825	0.952745	0.933748	1.0153	1	0.936137	0.86834
-16	-16	1.00383	0.928635	0.963089	1.09554	0.84659	0.914726	0.74833	0.910295	1.06853	0.975699	0.9281	1.00979	0.888903	0.880711	1.18885	1.06213	0.908903	0.873971	0.789351	1.04744	0.970703	1.07608	1.06284	0.974919	0.922772	0.887717	0.978076
-15.5	-15.5	1.02272	0.943145	1.06461	1.02585	0.816174	0.900653	1.0247	1.09964	1.10846	0.945254	0.997799	1.09915	0.94634	0.799056	1.207	0.970097	0.834368	1.02704	0.838177	0.902234	1.02995	1.02629	0.978212	0.87685	0.934654	0.840763	0.920822
-15	-15	0.957343	0.945218	0.998759	1.08582	0.864333	1.04842	1.15793	1.05594	1.05256	0.930756	1.02715	0.938298	0.888903	1.03236	1.11625	1.0134	0.784679	0.891253	0.794234	0.956074	0.862847	1.03535	1.01264	1.27489	0.99604	0.925866	0.949449
-14.5	-14.5	0.996566	0.986675	1.0358	1.03234	0.826313	0.960462	1.03604	0.994042	1.10526	1.18012	1.00514	0.93383	0.856082	0.626996	0.771392	1.01665	1.15942	0.809781	0.903278	0.978916	1.0497	1.02969	0.953828	1.06722	0.948515	0.897988	0.916051
-14	-14	0.912308	0.903761	0.989155	0.983717	0.909958	1.01675	0.96801	0.83383	1.09408	0.9699	0.994131	0.835532	0.867023	0.86613	1.04365	1.01882	0.801242	1.02457	0.818647	0.964232	0.92513	1.19942	1.04993	0.761475	0.924752	0.927334	1.10212
-13.5	-13.5	0.977681	0.934853	1.00699	1.00965	0.869402	0.928799	0.824863	1.02681	1.07971	0.974249	0.862069	1.06787	1.04754	0.988613	0.952895	1.06862	0.826087	0.923348	0.800744	0.965863	1.00716	1.30804	0.992555	0.928768	0.928713	0.899455	0.86834
-13	-13	0.999472	1.0074	0.912328	1.03072	0.917562	0.861953	1.04029	0.841112	1.07971	0.991646	1.18122	0.889149	0.894374	0.915706	0.971046	0.934368	0.950311	1.01963	0.880493	0.946285	0.998047	0.988954	1.02411	0.934537	0.964356	0.919997	1.08304
-12.5	-12.5	1.05903	0.870595	0.980924	1.02261	0.930235	1.16452	0.904232	0.924859	1.11804	0.90756	1.01981	0.880213	0.927195	0.845716	1.18885	0.918127	0.939959	0.980132	0.761683	0.918549	0.843099	1.02177	0.90793	1.17683	1.04554	0.947876	0.925594
-12	-12	1.06339	0.963873	0.915072	0.998302	0.907423	0.745854	1.00911	1.12148	1.09249	0.955402	0.906089	1.02766	0.916254	1.06152	0.853068	1.03939	0.964803	0.950506	0.896768	0.916918	1.03147	1.00819	1.16181	0.871081	0.879208	0.937605	0.927979
-11.5	-11.5	1.01981	0.938999	1.03443	0.978855	1.01642	1.11174	1.2047	0.924859	1.01742	0.943804	1.11519	0.929362	0.960016	0.988613	0.998271	1.01557	1.19255	0.915942	0.818647	0.889182	1.00868	1.07835	1.07001	0.657637	0.954455	0.98896	0.930365
-11	-11	0.982039	0.972165	1.03717	0.970752	0.925166	0.949908	1.15934	1.05958	0.913599	0.984398	0.953778	0.790851	0.943605	0.915706	1.08902	1.06213	0.871636	0.923348	0.97489	0.975653	0.870443	1.13832	1.03128	0.582644	1	0.930268	1.04249
-10.5	-10.5	0.952985	0.918271	0.928791	1.02261	0.953048	0.971017	0.966592	1.04866	0.904016	1.04384	0.957447	1.00979	0.842407	1.11401	1.00735	0.951691	1.07453	0.96285	0.997675	0.960969	0.97678	0.923326	0.989687	0.582644	1.13267	0.983091	0.95422
-10	-10	1.03579	0.930708	1.22238	0.964269	1.00881	1.06249	0.962341	1.00497	0.923182	0.891612	0.986794	0.871277	1.06942	1.03236	0.961971	0.986337	1.06418	1.18258	0.857707	0.843499	0.99349	0.905221	1.01407	0.773012	1.07921	1.01977	0.908895
-9.5	-9.5	0.993661	0.936926	0.985039	0.990199	0.904888	1.00972	1.23304	0.735518	0.999848	0.909009	0.913426	1.02319	0.987367	0.892376	1.0618	0.969014	1.17805	0.955443	0.989537	0.858183	0.888672	0.968587	1.01407	0.894156	1	0.924399	0.901738
-9	-9	0.958796	1.01569	1.03031	0.986958	0.970791	0.935835	1.07147	0.975836	1.19311	0.955402	1.0675	1.06787	0.858817	1.0761	0.998271	0.963601	0.873706	0.977663	0.943967	1.03928	0.873481	0.979902	0.973909	0.899925	1.00792	0.98896	0.994775
-8.5	-8.5	0.986397	0.953509	0.998759	1.05827	0.945444	1.04842	0.836202	0.892089	0.969501	1.03949	0.920763	1.07681	0.910784	0.971115	1.21608	1.01557	0.935818	0.997414	1.01395	1.01644	0.905382	0.832804	0.996858	0.905694	1	1.01977	0.963762
-8	-8	1.03869	1.02606	1.00562	1.04368	0.998672	0.992126	1.21887	0.903012	0.998251	0.96845	1.01247	0.938298	1.03113	0.839883	1.14347	1.03831	0.861284	1.01223	1.01395	1.02949	0.944878	1.1485	0.965303	1.21721	1.06931	1.0682	1.19277
-7.5	-7.5	0.947174	0.99082	0.958973	0.999923	1.07218	0.865472	1.03037	0.950348	0.979084	0.956852	1.02348	0.920426	0.910784	0.994445	0.961971	1.03506	0.94617	1.01223	0.87561	0.97239	1.00412	0.870144	0.981081	0.87685	1.05941	1.0051	0.811087
-7	-7	0.970417	1.04886	0.963089	1.02099	1.00121	1.00268	0.895728	0.83383	1.07332	1.03949	0.946442	0.920426	1.25267	1.05277	1.03457	1.00907	0.931677	0.980132	1.02046	1.10781	0.985894	1.05119	0.998292	1.76524	0.952475	0.974287	0.937521
-6.5	-6.5	0.945721	1.02606	1.01934	1.02747	0.973325	1.02731	0.840453	0.855677	1.02061	0.977149	0.986794	1.0634	0.979161	1.06152	1.11625	1.02964	0.89648	1.06901	1.01069	0.934864	0.99349	1.01498	0.939485	1.06145	1.04356	0.966951	0.947063
-6	-6	1.01109	1.00948	0.979552	1.05502	0.996138	0.992126	0.956671	0.910295	0.953529	1.13807	0.884079	0.942766	0.888903	1.25399	0.71694	1.03939	1.12215	0.930755	0.952104	1.01318	0.899306	1.04214	1.0112	1.36719	1.07525	0.975755	1.07111
-5.5	-5.5	0.941363	0.959728	0.974064	1.00316	1.01895	0.897135	0.880138	0.877524	0.983876	0.942354	1.00514	1.12596	0.927195	0.854465	0.934745	0.913797	0.983437	0.896191	1.12788	0.990336	1.2092	1.10098	0.968172	1.11914	0.938614	1.01244	0.899352
-5	-5	0.993661	1.00533	0.934278	0.956166	1.10766	0.904172	1.07856	1.46011	0.983876	0.984398	1.0088	0.974043	0.968221	0.985696	0.771392	0.9073	0.861284	0.920879	0.953732	1.01807	1.12261	1.0014	0.975343	1.24028	1.06337	1.01097	1.05203
-4.5	-4.5	1.01836	0.955582	0.949369	0.926995	0.978395	0.939353	0.958089	1.01589	0.963112	0.972799	1.02715	1.20638	1.25541	0.988613	0.90752	0.965766	0.952381	1.04432	1.03836	1.00991	0.960069	1.00819	1.04993	1.15375	1.06931	0.95668	0.992389
-4	-4	0.984945	1.05508	0.982296	0.949684	0.950513	0.935835	1.03887	0.691824	1.01742	1.13662	0.913426	0.884681	0.95728	1.0411	0.980121	1.01557	1.02277	0.94063	0.934201	0.931601	1.00868	0.925589	1.08005	1.13068	0.885149	1.0007	1.03056
-3.5	-3.5	0.996566	1.08203	1.04129	1.06313	0.963186	1.18211	1.00486	0.8666	1.04936	0.90611	0.931768	0.991915	1.12686	1.09651	0.889369	1.00366	1.15321	0.960381	0.930946	1.1127	1.17426	1.15529	0.946657	1.02684	1.07723	1.12248	0.968534
-3	-3	1.03143	1.03228	0.986411	1.05016	0.963186	1.02379	0.891476	0.910295	1.04936	1.02499	1.05649	0.884681	1.06942	0.915706	1.2433	0.973345	0.983437	1.09123	0.922809	1.01481	0.984375	1.06024	0.938051	0.957612	1.01386	0.975755	0.973305
-2.5	-2.5	0.996566	1.05508	1.04129	0.931857	1.06457	0.974535	1.04596	0.797418	1.04776	0.952503	1.10785	0.848936	1.146	0.883627	0.998271	1.05455	1.15321	0.903598	1.1409	0.907129	1.0816	1.08174	0.976778	1.07876	0.968317	1.0095	1.06395
-2	-2	0.964607	1.05093	0.953485	0.915651	1.03416	1.22433	0.982183	1.04866	1.00144	1.05979	1.05282	1.10362	1.02566	1.0936	1.01642	1.06537	1.10352	1.01716	1.09695	1.00502	1.03451	0.914273	0.91797	0.974919	1.05149	0.940539	1.06157
-1.5	-1.5	1.07065	1.02191	1.01248	0.983717	1.10259	1.0062	0.948168	0.979477	1.03978	1.04529	1.02715	1.10808	0.869758	0.950701	0.92567	1.01016	1.04762	1.07642	1.02697	0.990336	1.08008	0.922194	0.985383	1.02684	0.964356	1.00363	1.22379
-1	-1	0.990755	0.903761	0.996015	1.02585	0.998672	1.05545	1.00061	1.44191	0.872072	1.07138	1.0675	1.2466	0.970956	0.985696	1.25238	1.03614	0.890269	1.07148	1.02534	1.00176	0.919054	0.955008	1.0614	0.853775	0.889109	1.04178	1.00909
-0.5	-0.5	1.04741	1.02191	1.01522	0.935098	0.993603	1.01324	1.18769	0.852036	0.977487	1.05544	1.06016	0.93383	0.95181	1.01486	0.862143	1.01665	0.952381	0.997414	1.12625	1.07028	1.12869	0.944825	0.978212	0.853775	1.07921	0.999231	1.04964
0	0	1.73164	1.07788	1.08793	0.8881	1.59433	1.11878	0.840453	1.47832	1.33526	0.888713	2.22304	1.0634	1.72857	1.96556	0.662489	1.34146	0.792961	0.232071	1.3183	0.898971	1.30794	1.4178	1.03558	0.640331	1.10693	0.507686	1.29535
0.5	0.5	1.7883	1.07581	1.04266	0.990199	1.57151	1.15396	0.907066	1.54386	1.40713	1.01194	2.3551	1.15723	1.55627	1.76434	0.825843	1.36636	0.865425	0.281448	1.19949	0.898971	1.22895	1.12361	1.31671	0.5538	1.19406	0.677893	1.3216
1	1	1.77232	1.10275	1.14967	0.956166	1.69825	1.10119	0.895728	1.57299	2.48045	1.06414	2.50183	0.911489	1.4578	2.01805	0.69879	1.35445	0.979296	0.357983	1.2711	0.947917	1.22895	1.4393	1.30811	0.796087	1.09505	1.02711	1.34306
1.5	1.5	1.70695	0.972165	1.19632	0.996682	1.82499	1.06953	1.03462	1.57299	2.29837	0.998895	2.64123	0.93383	1.52891	1.66518	0.834918	1.23319	1.00621	0.590054	1.59498	0.995231	1.2411	1.40875	1.36261	0.986456	1.16436	1.13129	1.05918
2	2	1.74762	1.07166	1.12498	1.02585	1.71853	1.05545	1.09698	1.58027	2.4549	1.08298	2.84299	1.70681	1.60823	1.76142	1.11625	1.21912	0.881988	0.560428	1.4013	1.07681	1.37326	1.46419	1.41425	1.24605	1.20198	1.14303	1.31921
2.5	2.5	1.66627	0.986675	1.17437	1.04368	1.76162	1.28062	0.909901	1.58027	2.45809	1.15112	2.87601	0.844468	1.60276	1.91015	1.0981	1.21587	1.0352	0.703621	1.30365	0.988705	1.25781	1.79008	1.41281	1.23451	1.08713	1.14743	1.15222
3	3	1.66627	1.07788	1.11949	1.04206	1.82752	1.13637	0.902814	1.67494	2.48045	1.08298	2.88335	0.969575	1.58362	1.91307	0.90752	1.22453	1.07246	0.676464	1.33946	0.988705	1.30642	1.97338	1.47162	1.48834	1.05149	1.31177	1.188
3.5	3.5	1.66918	1.05922	1.01248	1.02747	1.88582	1.23136	0.873051	1.857	2.53476	1.14387	2.72927	1.20638	1.54532	2.05888	0.871219	1.19205	0.993789	0.780155	1.4664	1.01481	1.40972	1.48456	1.36835	1.51141	1.21386	1.25161	1.22617
4	4	1.6038	0.968019	1.06873	0.978855	1.9061	1.11174	1.12533	1.25621	2.70246	1.15257	2.92737	1.11255	1.75866	1.84599	0.998271	1.17906	1.06004	0.827063	1.24669	1.04255	1.29579	1.76292	1.46015	1.58064	1.10099	1.3103	1.18562
4.5	4.5	1.70549	1.04679	1.26628	1.09554	1.90863	1.21377	1.14517	1.32903	2.72163	1.29465	2.83199	1.08574	1.63832	1.97723	1.34313	1.15957	1.08903	0.678933	1.35736	1.03928	1.31554	1.66221	1.48453	1.50564	1.17426	1.21786	1.10451
5	5	1.61543	1.0841	1.22787	1.09878	1.86554	1.1223	1.01761	1.50381	2.61302	1.21491	2.77696	1.02766	1.74772	1.92765	1.00735	1.16606	1.27329	0.999883	1.42083	1.05886	1.13325	1.46646	1.37839	1.35566	1.01386	1.20905	1.2882
5.5	5.5	1.69242	1.10897	1.08107	1.03072	1.99988	1.2384	1.15934	1.87521	2.75038	1.14242	2.72194	1.18851	1.58362	1.75851	0.980121	1.24294	1.22567	0.955443	1.30853	1.13391	1.25781	1.71539	1.44293	2.3998	1.05743	1.17237	1.25003
6	6	1.62414	1.09032	1.17437	1.02909	1.7819	1.11526	1.05305	1.40549	2.7967	1.20621	2.91269	1.11702	1.64379	2.11137	0.998271	1.23752	1.23809	0.604867	1.45013	1.07681	1.19097	1.69389	1.45011	0.703787	1.10297	1.17971	1.12359
6.5	6.5	1.67499	1.06751	1.16751	1.05178	1.81738	1.33339	1.10407	1.27077	2.7376	1.15547	2.76229	1.19745	1.64652	1.99181	0.94382	1.22886	1.16149	0.313543	1.47617	1.14044	1.23351	1.61695	1.46158	0.409581	1.1802	1.18705	1.26673
7	7	1.6837	1.0613	1.23061	1.1474	1.95679	1.10823	1.05305	1.31811	2.84302	1.25406	2.76229	1.0634	1.58088	1.96556	1.2433	1.414	1.16563	0.407359	1.42734	1.10944	1.27148	1.79234	1.46301	1.45949	1.14455	1.21933	1.13314
7.5	7.5	1.64303	1.02813	1.16202	1.08744	1.83005	1.37209	1.16926	1.23436	2.83184	1.18157	2.90169	1.28681	1.39763	1.73226	1.10717	1.28191	1.28571	0.528333	1.5315	1.18612	1.26389	1.69729	1.57346	0.853775	1.1604	1.34698	1.15461
8	8	1.72293	1.05508	1.17985	1.08582	1.88582	1.16452	1.34359	1.30718	2.62899	1.14532	3.01908	0.831064	1.6684	2.11429	1.07995	1.19855	1.36646	0.4913	1.25157	1.16165	1.33832	1.87833	1.44293	1.16529	1.14851	1.21052	1.19039
8.5	8.5	1.55151	1.0302	1.10714	1.08582	1.94665	1.25951	1.2543	1.31811	2.75677	1.12793	2.67792	1.00979	1.559	1.95973	1.03457	1.27867	1.30021	0.913473	1.42897	1.25628	1.40365	1.53209	1.34397	2.59017	1.12079	1.13716	1.0401
9	9	1.62705	1.04057	1.21278	1.06475	1.80978	1.1997	1.37619	1.18702	2.80469	1.09603	2.65224	0.982979	1.6055	2.05596	1.0981	1.25485	1.25466	1.23689	1.33457	1.07354	1.11957	1.55019	1.3913	1.39027	1.2	1.21639	1.13314
9.5	9.5	1.53407	1.07166	1.14281	0.986958	1.87061	1.21025	1.22737	1.21251	2.76635	1.03949	2.7256	1.0634	1.67114	1.91598	0.853068	1.22128	1.38716	1.22948	1.42734	1.22201	1.38845	2.03675	1.37552	1.13068	1.04554	1.10781	1.188
10	10	1.60671	1.09032	1.05775	1.1004	1.86554	1.22784	1.06722	1.19431	2.82385	1.38599	2.62656	1.08128	1.58362	2.20178	1.14347	1.23969	1.12215	1.73066	1.45989	1.14859	1.23958	2.01299	1.33966	1.60948	1.20792	1.18118	1.29058
10.5	10.5	1.736	1.09032	1.16064	1.07123	1.75401	1.09064	1.23021	1.44191	2.87177	1.08443	2.65591	1.03213	1.66293	2.12887	0.952895	1.28516	1.27536	2.05408	1.54452	1.20407	1.35503	1.93152	1.41999	1.45949	1.00396	1.25601	1.31444
11	11	1.52245	1.04679	1.17437	1.06313	1.83259	1.2384	1.50941	2.50877	2.87337	1.3048	2.5055	1.34042	1.50156	2.03555	1.03457	1.20071	1.18012	1.87632	1.19135	1.16817	1.31554	1.80365	1.496	1.70755	1.05545	1.14449	1.30251
11.5	11.5	1.70259	1.00533	1.25942	1.04692	1.82499	1.25599	0.93116	1.12148	2.9101	1.18882	2.75128	0.929362	1.46327	2.12887	1.00735	1.26134	1.27536	2.02692	1.35573	1.25954	1.48112	1.90323	1.39273	1.74216	1.11485	1.15183	1.16653
12	12	1.6009	1.1069	1.17299	1.09878	1.7895	1.37912	1.44422	1.13605	2.88295	1.07573	2.78797	1.12149	1.62738	1.8839	1.07087	1.18339	1.26294	2.46391	1.61125	1.09312	1.36111	1.84778	1.4372	1.71909	1.33267	1.19585	1.18562
12.5	12.5	1.67353	1.0841	1.19083	1.10526	1.81231	1.18914	1.37194	1.15425	2.95961	1.16127	2.63756	1.05894	1.62191	2.11429	0.971046	1.2765	1.22774	2.38737	1.37689	1.18612	1.50694	1.80479	1.3411	1.62102	1.13663	1.25307	1.28104
13	13	1.54279	1.01362	1.18122	1.0842	1.75148	1.25951	1.32375	1.30718	2.85739	1.11053	2.58988	0.911489	1.56174	1.95389	1.11625	1.28841	1.36232	2.54785	1.39805	1.05723	1.33073	1.96659	1.56629	2.03637	1.12871	1.15477	1.21902
13.5	13.5	1.55005	1.12348	1.09479	1.05665	1.83766	1.17507	1.17068	1.30354	2.75517	1.25696	2.53485	0.951702	1.80789	2.07346	1.0255	1.19855	1.1822	2.26393	1.43223	1.15675	1.42795	2.0673	1.62796	2.00176	1.16436	1.13422	1.05918
14	14	1.69823	0.978383	1.14967	1.06637	1.68811	1.36505	1.2954	1.00861	2.80788	1.08153	2.25972	1.22426	1.59182	2.01805	1.17978	1.1888	1.13044	2.21455	1.23041	1.04744	1.31858	1.87381	1.54477	2.10559	1.06139	1.21786	1.38362
14.5	14.5	1.60235	1.05508	1.10714	1.12471	1.69825	1.09415	1.55193	1.23436	2.84781	1.19461	2.61922	1.30468	1.73405	1.92765	1.22515	1.16823	1.23395	2.1874	1.34922	1.09475	1.27756	1.61016	1.36261	2.09982	1.04753	1.18264	1.19755
15	15	1.71566	0.949363	1.14967	1.14092	1.64249	1.34042	1.04029	1.0523	2.81906	1.13662	2.26339	1.28681	1.38122	1.91307	1.28868	1.2451	1.28571	2.03927	1.25157	1.19265	1.20464	1.48909	1.31528	2.00752	1.06337	1.12248	1.15938
15.5	15.5	1.70695	0.986675	1.19632	0.811931	1.70332	1.22081	1.44989	1.08507	2.87816	1.09458	2.40646	1.28681	1.52891	1.77309	1.21608	1.35337	1.31056	2.13308	1.2532	1.19591	1.30035	1.78329	1.31815	1.54602	1.21584	1.23693	1.21186
16	16	1.59654	1.07373	1.1579	0.902686	1.69572	1.30876	1.6724	1.13969	2.95802	1.18012	2.67058	1.29128	1.559	1.77892	1.15255	1.10002	1.12008	1.90842	1.33946	1.16654	1.35807	1.68824	1.38986	1.63832	1.05941	1.21639	1.28343
16.5	16.5	1.62269	1.04471	1.17985	0.847584	1.67797	1.42486	1.48532	1.08507	2.87975	1.15837	2.33676	1.21979	1.52891	2.23094	1.29775	1.15632	1.35611	1.96273	1.206	1.10781	1.45985	1.50606	1.72406	1.99022	1.2	1.12395	1.2047
17	17	1.61252	1.04264	1.02757	0.904306	1.71092	1.40375	1.05163	1.31082	2.96441	1.19606	2.5752	1.06787	1.74772	1.83433	1.55186	1.20612	1.12215	2.04914	1.51848	1.16817	1.32313	1.62713	1.43433	1.68447	1.05941	1.2428	1.23571
17.5	17.5	1.65174	1.05508	1.09617	0.956166	1.83766	1.21729	1.17635	1.00132	2.75198	1.17142	2.50917	1.01872	1.53438	1.67685	1.18885	1.283	1.16149	1.91089	1.30365	1.1698	1.22743	1.46646	1.32675	1.97291	1.11485	1.13276	1.18562
18	18	1.6009	1.08617	1.12498	0.912409	1.69572	1.29821	1.37336	1.25621	2.77434	1.2932	2.34043	0.93383	1.62464	2.01222	1.08902	1.26676	1.13251	2.26146	1.29063	1.09639	1.32313	1.51964	1.37839	1.78831	1.07921	1.20905	1.12837
18.5	18.5	1.69823	1.06544	1.10577	0.925374	1.93651	1.37912	1.37619	1.28898	2.7967	1.16852	2.35143	0.907021	2.0814	1.72351	1.1707	1.29491	1.1118	2.38737	1.38665	1.18612	1.22439	1.53096	1.3913	1.90946	1.18812	1.15036	1.16653
19	19	1.72147	0.978383	1.07559	0.946442	1.78696	1.40023	1.01053	1.39093	2.78712	1.22941	2.48349	1.17957	1.75593	1.85183	1.34313	1.20396	1.32298	1.97261	1.22716	1.12902	1.23199	1.59885	1.28229	1.40758	1.1901	1.20025	1.26673
19.5	19.5	1.736	0.997039	1.20866	0.920512	1.81992	1.47763	1.20186	1.24892	2.77753	1.21781	2.45781	1.17511	1.61917	1.80517	1.1707	1.08595	1.62112	1.86151	1.29551	1.18122	1.4553	1.73237	1.33966	1.82869	1.09505	1.15036	1.2047
20	20	1.56749	0.978383	1.12772	1.00154	1.71092	1.35098	1.1806	1.17246	2.6817	1.12793	2.5055	1.09468	1.5672	1.9364	1.47926	1.16498	1.09524	2.03186	1.39968	1.24649	1.42036	1.93717	1.44724	1.44796	1.04158	1.15477	1.21186
20.5	20.5	1.63576	0.901688	1.14144	0.93996	1.80471	1.5093	1.12249	1.18338	2.80469	1.16707	2.47616	1.04106	1.54806	1.77309	1.49741	1.2765	1.09938	2.13802	1.26622	1.21385	1.23958	2.02656	1.38843	1.49411	1.14455	1.12395	1.10928
21	21	1.63431	0.941072	1.02345	0.946442	1.77176	1.45653	1.35777	1.18702	2.82066	1.16127	2.51651	0.965106	1.59182	1.91015	1.00735	1.21912	1.14907	1.89114	1.35085	1.2628	1.39453	1.97678	1.39417	1.90369	1.01584	1.14009	1.10689
21.5	21.5	1.63576	0.99082	1.18671	0.926995	1.87568	1.46004	1.32233	1.09964	2.80628	1.07573	2.62289	1.00979	1.45233	2.00056	1.2433	1.20937	1.13872	1.80226	1.29551	1.10454	1.21832	1.89304	1.39704	1.79985	1.12079	1.08434	1.22856
22	22	1.59945	1.02606	1.18671	0.928616	1.70078	1.52689	1.21037	1.13241	2.9133	1.08443	2.65591	1.18851	1.34019	1.79642	1.15255	1.23861	1.15528	1.67881	1.38828	1.21222	1.39909	2.42034	1.36548	1.66717	1.16238	1.12835	1.19516
22.5	22.5	1.51519	0.924489	1.17711	0.951304	1.79964	1.35098	1.00344	1.02681	2.72962	1.09313	2.53485	1.11702	1.4496	1.93348	1.36128	1.29274	1.15528	1.743	1.38665	1.22201	1.36111	2.25061	1.36835	1.18836	1.08515	1.12542	1.23094
23	23	1.67208	0.988747	1.10028	0.985337	1.77683	1.4319	1.07289	1.22344	2.78552	1.25116	2.32942	1.09468	1.38942	1.81683	0.989196	1.13575	1.27329	1.12086	1.27761	1.15512	1.37326	2.48936	1.27225	0.628794	1.17822	1.06232	1.23094
23.5	23.5	1.56313	0.870595	1.18671	1.01451	1.83766	1.50578	1.25147	1.01225	2.75358	1.11053	2.47616	1.24213	1.67934	1.70018	1.3522	1.13575	1.28778		1.21902	1.21712	1.20464	2.12953	1.34827		1.16238	1.12248	1.09258
24	24	1.65029	1.02191	1.114	1.03072	1.70078	1.44949	1.10265	1.19067	2.94843	1.14967	2.39178	1.12149	1.70943	1.91598	0.834918	1.2765	1.14907		1.36387	1.17959	1.21072	1.7516	1.27225		1.06139	1.05205	1.14983
24.5	24.5	1.72293	0.980456	1.18534	0.990199	1.74134	1.46356	1.2543	1.00861	2.68649	1.08443	2.7953	1.09021	1.65746	1.9189	0.980121	1.25268	1.14907		1.33295	1.16654	1.29883	1.72558	1.3454		1.09505	1.10488	0.992389
25	25	1.55732	0.936926	1.18671	0.999923	1.7236	1.38968	1.32375	1.26713	2.7967	1.01919	2.26339	1.01425	1.52344	1.80225	1.05272	1.15957	1.2588		1.40456	1.11923	1.40516	1.87946	1.49027		1.02376	1.11955	1.24049
25.5	25.5	1.61688	1.00326	1.11263	1.00154	1.7971	1.43893	1.14092	1.15425	2.87656	1.16127	2.41012	1.17064	1.54532	1.89849	0.934745	1.29491	1.21739		1.29877	1.13228	1.2806	1.8376	1.37122		1.05941	1.03298	1.06873
26	26	1.59073	1.02813	1.14007	0.96589	1.76415	1.25599	1.04738	1.11056	2.89892	1.2671	2.35877	1.31808	1.54532	1.8839	1.23423	1.33497	1.11594		1.32644	1.16817	1.39909	1.74934	1.2995		0.99604	1.03885	1.29535
26.5	26.5	1.49775	0.957655	1.12909	1.03558	1.65009	1.4706	1.09557	1.06322	2.7392	1.18592	2.21203	1.20192	1.79695	1.97431	1.39758	1.24619	1.24845		1.29877	1.09312	1.22895	2.07522	1.33106		1.0396	1.03005	1.16653
27	27	1.42221	0.858158	1.07421	0.975614	1.70078	1.3932	1.10974	0.881165	2.90371	1.06703	2.25238	1.34489	1.38122	1.74392	0.980121	1.28733	1.07246		1.40456	1.17796	1.29579	1.669	1.31241		1.08119	1.1665	1.15461
27.5	27.5	1.24353	0.912052	1.14967	0.944822	1.79457	1.4706	1.28265	1.10328	2.70566	1.06269	2.30007	1.19745	1.71216	1.98597	1.08902	1.26026	1.1822		1.26785	1.14207	1.35655	1.69955	1.31958		0.99802	1.09314	1.2047
28	28	1.32779	0.862304	1.13183	0.988579	1.64502	1.40023	1.47256	0.932142	2.6258	1.07428	2.10198	1.13043	1.28276	1.67685	1.2796	1.16065	1.17598		1.38991	1.09475	1.3839	1.95641	1.37409		1.05149	1.06232	1.26434
28.5	28.5	1.24934	0.986675	1.04266	0.954545	1.78443	1.41431	1.4669	1.13969	2.59865	1.31785	2.5055	1.29574	1.55353	1.89557	1.1344	1.28191	1.10145		1.31667	1.24322	1.53581	1.52077	1.26651		1.02376	1.11075	1.19277
29	29	1.20576	1.06337	0.994643	1.00154	1.7388	1.38264	1.31808	0.997683	2.6801	1.18882	2.2854	1.07681	1.41951	1.94223	0.989196	1.22994	1.03727		1.16206	1.0817	1.37174	2.18158	1.22778		1.01782	0.99483	1.14745
29.5	29.5	1.14329	0.854012	1.13183	0.917271	1.64249	1.5093	1.03746	0.95763	2.61142	1.14532	2.26339	1.09915	1.63011	1.89849	1.16162	1.22128	1.0559		1.25971	1.14044	1.33832	1.92699	1.30954		1.11089	1.20612	1.17131
30	30	1.12005	0.953509	1.05775	0.999923	1.57405	1.60429	1.34926	0.870242	2.77434	0.982948	2.2854	1.01425	1.41131	1.97139	1.15255	1.33605	1.0207		1.4013	1.13391	1.19401	1.65542	1.38556		1.0099	1.05205	1.15222
30.5	30.5	1.01255	0.994966	1.13595	0.91403	1.66783	1.57262	1.49099	1.20887	2.55552	1.16127	2.2157	1.05	1.43866	1.58936	1.43388	1.18339	0.927536		1.24994	1.15023	1.41276	1.59771	1.18762		0.922772	1.0858	1.2047
31	31	1.12876	0.978383	1.07147	0.988579	1.56898	1.36505	1.00911	0.939424	2.66094	1.08153	2.31841	1.09021	1.75866	1.90432	1.207	1.37178	1.25259		1.37201	1.14859	1.22287	1.96546	1.35257		1.00396	1.0726	1.16653
31.5	31.5	1.04741	0.924489	1.09205	0.93996	1.60193	1.52689	1.12108	1.04866	2.61142	1.08443	2.17535	1.07681	1.72857	1.67685	1.34313	1.18447	1.03106		1.27598	1.28238	1.26389	1.98243	1.20053		1.03366	1.04472	1.17369
32	32	1.12295	0.924489	1.03168	0.91403	1.67544	1.55503	1.25997	1.31082	2.55712	0.940904	2.30741	1.21085	1.56174	1.90724	1.04365	1.27325	1.08903		1.41432	1.17796	1.43707	1.86362	1.3454		0.974257	1.12102	0.994775
32.5	32.5	1.13893	1.01984	1.08245	0.931857	1.76669	1.38968	1.21462	1.01225	2.44851	1.13517	2.20103	0.987447	1.42224	1.92182	0.898444	1.10976	1.08282		1.26785	1.19754	1.17426	2.08201	1.3038		1.14455	1.05792	1.17131
33	33	1.05758	0.891324	1.12086	0.93996	1.6729	1.54096	1.46123	0.77193	2.61781	1.08878	1.97359	1.02766	1.44139	1.59519	1.1344	1.17256	1.23602		1.50221	1.13717	1.45985	2.07296	1.32532		0.962376	1.0726	1.14506
33.5	33.5	1.04596	0.893397	1.09205	0.944822	1.60953	1.57966	1.03746	1.28534	2.52677	1.15837	2.12766	1.05	1.54259	2.05888	1.39758	1.25593	1.28985		1.34434	1.13065	1.31858	1.80365	1.27082		1.14059	1.07993	1.05203
34	34	1.07792	0.895469	0.963089	1.02423	1.58165	1.49523	1.24722	0.935783	2.45969	1.08298	2.24505	0.880213	1.59729	1.97431	0.961971	1.25809	1.13458		1.35248	1.06865	1.35503	1.84665	1.21631		0.964356	1.20025	1.14983
34.5	34.5	1.02562	0.957655	0.989155	1.01451	1.62221	1.38264	1.24296	0.906653	2.39261	1.04239	2.31108	1.19745	1.28549	1.87224	1.47926	1.26242	1.34162		1.46803	1.22854	1.38845	2.66474	1.23065		1.05743	1.11955	1.11405
35	35	0.980586	0.885105	1.05912	1.01127	1.62221	1.4319	1.01903	0.917577	2.37663	1.00179	2.24872	1.38064	1.38122	1.9014	1.26145	1.21695	1.1118		1.49733	1.16165	1.40516	1.85005	1.13455		1.03366	1.04325	1.2214
35.5	35.5	1.0692	0.82292	0.990527	0.948063	1.54363	1.38968	0.881555	1.24892	2.34789	1.01194	2.28173	1.34489	1.54259	1.9364	1.41573	1.26026	1.10352		1.82446	1.19428	1.35807	1.95528	1.26077		0.944554	1.1665	1.29535
36	36	0.974776	0.9618	1.01934	0.983717	1.67037	1.4319	1.12391	1.35816	2.41976	1.04384	2.23771	1.23766	1.57268	2.12887	1.42481	1.25593	1.09938		1.42409	1.16817	1.39149	2.27776	1.12738		0.936634	1.03151	1.13791
36.5	36.5	0.906498	0.905834	1.01797	0.975614	1.62728	1.52689	1.11682	0.946706	2.57948	1.06124	2.57153	1.14383	1.4578	2.11429	1.3159	1.22994	1.01656		1.55103	1.2318	1.32313	2.04014	1.15894		0.954455	1.02564	1.17369
37	37	0.968965	0.936926	1.0015	1.0372	1.58672	1.46356	1.48815	1.00861	2.3942	1.09168	1.94791	0.996383	1.43319	1.99472	1.16162	1.20721	1.10352		1.46966	1.18286	1.29579	1.59319	1.1948		1.02574	1.05352	1.0234
37.5	37.5	0.918119	0.847794	1.00973	1.00803	1.52336	1.62188	0.867382	1.44191	2.55872	1.08298	2.36244	1.39851	1.6602	1.85474	1.22515	1.14333	1.05797		1.49244	1.16817	1.37023	2.02091	1.21201		1.12871	1.04472	1.22379
38	38	0.964607	0.663311	1.09068	1.00154	1.73374	1.49874	0.819194	1.12148	2.59705	0.985847	2.23037	1.27787	1.87627	1.87807	1.51556	1.28191	1.23395		1.54615	1.20243	1.30187	2.33434	1.17041		0.918812	1.05205	1.12598
38.5	38.5	0.836767	0.907906	1.0262	0.964269	1.61714	1.39672	1.15793	1.08507	2.64017	1.02354	2.24872	1.01872	1.31558	2.1522	1.22515	1.19855	1		1.59823	1.1698	1.27756	2.03335	1.26508		0.948515	1.0682	1.01386
39	39	1.0169	0.729642	0.926047	1.0064	1.49547	1.49874	1.3932	0.943065	2.51879	1.12648	2.37344	1.17511	1.42498	2.01805	1.55186	1.23103	0.993789		1.46478	1.16328	1.33984	2.11822	1.1489		0.942574	0.983091	1.14029
39.5	39.5	1.02126	0.887178	1.00973	0.946442	1.61714	1.34746	0.926908	1.2999	2.62101	1.18157	1.87454	1.2734	1.52891	1.97431	1.58816	1.19963	1.19255		1.47129	1.15838	1.12717	2.08201	1.23782		0.976238	1.03151	1.16415
40	40	0.993661	0.862304	1.03717	0.946442	1.71092	1.41782	1.26281	1.17246	2.59865	0.930756	2.24505	1.17064	1.60823	1.81975	1.32498	1.25918	1.01863		1.48919	1.17307	1.20464	2.59572	1.22922		1.03366	1.07406	1.0735
40.5	40.5	1.04886	0.833284	0.990527	0.918892	1.47773	1.32635	1.04171	1.11056	2.61941	0.938005	2.21937	1.14383	1.36481	2.1347	1.19793	1.17906	0.99793		1.42897	1.23343	1.39301	2.13406	1.09869		0.972277	1.0726	1.11167
41	41	1.00964	0.957655	1.02483	1.01451	1.4828	1.53041	0.885807	1.21251	2.58906	1.03659	2.05062	1.07681	1.46054	2.26885	1.207	1.23211	0.977226		1.57545	1.29869	1.33377	2.33094	1.12882		0.99604	1.01244	1.08781
41.5	41.5	1.10552	0.835357	1.06324	1.02585	1.4828	1.49523	1.21604	1.23436	2.47886	1.06993	2.21937	1.17511	1.41951	2.01222	1.16162	1.26134	0.956522		1.63892	1.22038	1.34592	2.22458	0.993989		1.05347	1.04178	1.12598
42	42	0.980586	0.839503	0.912328	0.973993	1.47773	1.40375	1.07998	0.943065	2.60184	0.919158	2.0653	1.29128	1.40037	2.24844	1.22515	1.24835	0.890269		1.45501	1.12902	1.21072	1.86249	1.13742		0.869307	1.03591	1.21902
42.5	42.5	1.05322	0.999112	0.996015	0.990199	1.61714	1.23136	0.881555	1.33267	2.67851	1.01484	2.06163	0.996383	1.49609	2.40883	1.38851	1.23211	1.02485		1.45013	1.22854	1.53885	2.03562	1.1489		0.964356	1.0814	1.13075
43	43	0.977681	0.872668	0.882145	0.941581	1.44478	1.47412	1.06297	1.15789	2.73601	1.20911	2.17902	1.34936	1.63011	2.05888	1.23423	1.34471	1.03727		1.60637	1.20243	1.25326	1.90775	1.12882		1.07129	1.10194	1.31682
43.5	43.5	1.02562	0.901688	0.867054	0.879997	1.65009	1.26654	1.34501	1.25985	2.87017	1.12068	2.01394	1.30468	1.42772	1.87516	1.72429	1.19638	1.00621		1.40944	1.06865	1.46745	2.40676	1.1575		1.06931	1.10194	1.16176
44	44	1.02272	0.959728	0.880773	0.930236	1.44985	1.41782	0.958089	0.9285	2.72483	1.13662	2.20103	1.12149	1.46327	2.55464	1.36128	1.18555	1.03313		1.51523	1.09312	1.34136	2.25739	1.09439		1.00198	1.01537	1.15699
44.5	44.5	0.945721	0.885105	1.01111	0.925374	1.46759	1.31932	1.19619	0.979477	2.42615	1.15547	2.0763	1.13043	1.67387	2.61297	1.37035	1.15849	1.08075		1.7089	1.12902	1.24566	2.16122	1.26221		0.974257	1.0095	1.13552
45	45	0.982039	0.876814	0.902724	0.897824	1.43464	1.18914	0.834784	1.10328	2.6258	0.964101	2.146	1.08128	1.30737	2.29801	1.23423	1.20288	1.19048		1.62427	1.06539	1.3839	2.58101	1.07001		0.964356	1.0095	1.14506
45.5	45.5	0.992208	0.963873	0.969948	0.990199	1.53856	1.27358	1.11824	1.09964	2.69607	1.12358	2.24872	0.982979	1.42224	2.38259	1.34313	1.07404	1.11801		1.41921	1.19265	1.26237	2.55951	1.15607		0.910891	0.999231	1.23571
46	46	1.0968	0.870595	0.943882	0.990199	1.61207	1.26303	1.16926	1.21979	2.7376	1.05834	2.14233	1.09021	1.34566	2.19886	1.32498	1.33172	1.03727		1.33946	1.17959	1.23351	2.07635	1.11878		0.926733	1.02858	1.26911
46.5	46.5	0.900687	1.02191	0.969948	0.909168	1.47266	1.41431	0.922656	1.07779	2.52198	1.06559	2.2157	1.05894	1.79422	2.19595	1.37035	1.15091	1.39545		1.54615	1.1127	1.34744	2.45315	1.08005		0.906931	0.997764	1.18562
47	47	0.980586	0.907906	0.847847	0.879997	1.52842	1.34746	0.897145	1.27077	2.65934	1.15982	2.22304	1.25106	1.38942	2.30093	1.50648	1.17473	1.02899		1.48268	1.15349	1.39149	2.60704	0.421693		0.980198	1.15623	1.17846
47.5	47.5	1.0968	0.957655	0.927419	0.998302	1.57151	1.39672	1.01336	1.09235	2.71684	1.09313	2.41379	1.05447	1.40037	2.5109	1.82411	1.11734	0.971015		1.58521	1.25954	1.40213	2.30266	1.11878		0.906931	1.16063	1.2548
48	48	0.990755	0.953509	0.965833	0.990199	1.63995	1.43542	1.01336	0.855677	2.70566	1.04094	2.20103	0.750638	1.50977	2.30093	1.58816	1.16282	1.18012		1.59498	1.15675	1.33681	2.00393	1.0155		0.966337	1.01831	1.2882
48.5	48.5	0.996566	0.922416	0.953485	0.926995	1.68558	1.13285	0.897145	0.961271	2.69767	1.26276	2.13867	1.11702	1.59182	2.44966	1.28868	1.19746	1.10766		1.54452	1.12902	1.15148	1.99941	1.09439		0.845545	1.05205	1.15699
49	49	1.10407	0.982529	0.949369	0.920512	1.42957	1.26654	0.593845	0.964912	2.68969	1.12358	2.12032	0.871277	1.69575	2.2776	1.55186	1.06646	1.19462		1.62753	1.11923	1.25326	2.28116	1.1116		0.952475	1.00217	0.913666
49.5	49.5	1.02417	0.831211	0.880773	0.99182	1.43211	1.28765	1.13383	0.924859	2.71524	1.15692	2.08364	1.09021	1.73678	2.0093	1.30683	1.08703	1.12422		1.61776	1.25301	1.28212	2.18837	1.09296		0.924752	1.08287	1.12359
50	50	1.10843	1.04057	0.808062	0.977234	1.52082	1.18211	0.922656	1.08507	2.60184	0.955402	2.07997	1.15723	1.44686	2.21928	1.47926	1.16498	1.1118		1.82283	1.17633	1.34288	2.16235	1.12882		0.847525	0.946409	1.13075
50.5	50.5	0.935552	0.916198	0.867054	0.922133	1.45999	1.21729	1.00769	1.17246	2.79351	0.930756	2.25238	0.911489	1.22258	2.1347	1.72429	1.18989	1.17391		1.65194	1.19101	1.24718	2.72698	1.16611		0.938614	1.12395	1.20709
51	51	1.00528	0.874741	0.956229	0.973993	1.68304	1.20322	1.00344	1.21251	2.57948	1.04964	1.90756	1.16617	1.47695	2.10554	1.86041	1.09352	1.15528		1.68938	1.07844	1.20768	2.29134	1.11447		0.90297	1.04472	1.11644
51.5	51.5	1.05032	0.912052	0.861567	0.954545	1.63235	1.42134	1.10407	1.02681	2.69607	1.06414	2.17535	0.929362	1.31011	2.17261	1.51556	1.23969	1.13458		1.66984	1.11433	1.28819	2.47578	1.06858		0.831683	1.05352	1.386
52	52	1.04886	0.980456	0.920559	0.878376	1.70078	1.28062	1.00911	1.17246	2.78073	1.01919	2.09098	1.07681	1.59456	2.20469	1.62446	1.16065	1.11594		1.49082	1.05886	1.39757	2.04806	1.10874		0.768317	1.10341	1.13552
52.5	52.5	1.01545	0.930708	0.836872	0.96751	1.67797	1.15396	0.958089	1.25621	2.74878	1.03804	2.01027	1.05894	1.55353	2.24552	1.47926	1.13683	1.11594		1.63241	1.01318	1.44162	2.48031	1.19766		0.861386	1.00217	1.12121
53	53	1.01836	0.922416	0.89998	0.847584	1.49294	0.86899	1.11257	1.20159	2.79989	0.90756	1.91489	1.27787	1.45507	2.35926	1.52463	1.21262	1.12836		1.46966	1.22854	1.21376	2.47578	1.04993		0.881188	1.10634	1.35261
53.5	53.5	0.929741	0.936926	0.910956	0.935098	1.61967	1.07304	0.942499	1.03774	2.68969	1.10328	2.03962	0.920426	1.22258	2.08513	1.44296	1.1639	1.147		1.63729	1.0817	1.23199	2.62288	1.04563		0.869307	0.958147	1.35022
54	54	1.03579	1.08824	0.86431	0.957787	1.60447	1.19266	0.824863	1.10692	2.75996	1.12358	2.2744	1.00979	1.27729	2.39425	2.04192	1.23428	1.16563		1.67473	1.10781	1.4158	2.73377	1.05423		0.908911	1.12395	1.25241
54.5	54.5	0.912308	0.974237	0.965833	0.943201	1.57405	1.03083	0.619356	1.16518	2.67531	1.02354	1.97359	1.00979	1.70396	2.2951	1.50648	1.18122	1.00414		1.5787	1.08333	1.273	2.43278	1.05423		0.815842	1.10341	1.24764
55	55	0.887612	0.963873	0.882145	0.873514	1.41436	1.17155	0.921239	1.06322	2.6833	1.00469	2.21203	1.00532	1.40037	2.11137	1.47926	1.16065	1.04141		1.44199	1.19265	1.45074	2.32868	1.11878		0.926733	0.997764	1.29297
55.5	55.5	1.01109	0.980456	0.919187	0.996682	1.48787	1.1997	0.81636	1.1142	2.76156	1.04964	1.97359	0.822128	1.39216	2.21344	1.57908	1.20612	1.16563		1.71541	1.04255	1.25781	2.61722	1.23352		0.8	1.02271	1.36692
56	56	1.0692	0.953509	0.901352	0.910789	1.57151	0.872508	0.673213	1.15061	2.78552	1.10763	1.97726	0.947234	1.40857	2.4205	1.64261	1.2202	1.01035		1.4664	0.995231	1.36111	2.16235	1.10587		0.883168	1.10634	1.29774
56.5	56.5	1.15927	1.01362	0.869798	0.933477	1.44731	0.98509	0.840453	1.18702	2.81267	0.951053	1.89288	0.987447	1.41404	2.53423	1.76059	1.09461	0.981367		1.73169	1.16654	1.25781	2.39431	1.13599		0.827723	1.07847	1.30967
57	57	1.02272	1.04471	0.787483	0.977234	1.48026	1.13285	0.707228	0.782853	2.87656	1.01484	2.24138	1.12596	1.38669	2.38842	1.36128	1.07837	1.02692		1.69263	1.16491	1.1454	2.26418	1.06427		1.00396	1.11661	1.2882
57.5	57.5	0.995114	0.907906	0.915072	0.922133	1.65009	0.629754	0.786597	1.03045	2.78712	1.04964	2.08731	0.965106	1.59182	2.43508	1.80596	1.15091	1.01656		1.67635	1.12739	1.27148	2.4011			0.89703	1.03005	1.40032
58	58	1.07647	0.997039	0.856079	0.949684	1.37888	0.865472	0.796517	1.33631	2.76955	1.04964	2.17902	1.02319	1.51524	2.70921	1.96024	1.16931	1.00207		1.50058	1.08496	1.38238	2.17366			0.924752	0.999231	1.10928
58.5	58.5	1.00673	1.00533	0.84236	0.912409	1.351	0.921763	0.867382	0.979477	2.77114	1.00614	1.9956	0.991915	1.47148	2.59839	1.54278	1.10976	1.04969		1.58033	1.20896	1.3763	2.10803			0.89901	1.06966	1.4528
59	59	1.16654	1.06959	0.809434	0.899444	1.59686	0.872508	0.909901	1.08507	2.79351	1.04674	2.08364	1.2734	1.56994	2.47882	1.46111	1.0448	1.00828		1.7089	1.12412	1.30642	2.25739			0.936634	1.0095	1.32875
59.5	59.5	1.4934	0.963873	0.834128	0.878376	1.46759	1.0836	0.690221	1.0523	2.71045	0.895961	1.96625	1.15723	1.45507	2.49924	1.3159	1.16606	0.931677		1.72518		1.44466	2.39431			0.984158	1.10341	1.36215
60	60	1.52681	1.06337		0.847584	1.46506	1.66058	0.681717	0.990401	2.61621		2.16434	1.17511	1.3019	2.30385	1.25238	1.21479	0.944099		1.68612		1.32617	2.13858			0.867327	1.01537	1.45519
60.5	60.5	1.44982	1.06544		0.891341	1.55124	0.696599	0.819194	1.02317	2.77274		2.08364	0.987447	1.55627	2.61297	1.63353	1.12925	0.865425		1.73494		1.45074	2.39997			0.811881	1.08727	1.40032

## Sheet: Fig7D
	E4 Control			E4 Reelin			E4 EMD			E4 EMD Reelin
X	MEAN	SEM	N	MEAN	SEM	N	MEAN	SEM	N	MEAN	SEM	N
-20	0.898662	0.045192	12	1.00589	0.039596	14	0.9686	0.056417	13	0.945812	0.036059	15
-18	0.942688	0.042093	12	1.00066	0.039691	14	0.957097	0.042265	14	0.988276	0.042203	15
-16	0.934882	0.04178	12	0.980207	0.030361	14	0.977085	0.035012	14	0.987253	0.044742	15
-14	0.963886	0.031783	12	0.966157	0.039982	14	0.971189	0.041799	14	0.98185	0.039157	15
-12	1.00352	0.073708	12	0.998939	0.023914	14	1.01183	0.038923	14	0.982998	0.037678	15
-10	0.987148	0.043355	12	0.983603	0.029565	14	0.981453	0.045405	14	0.983474	0.03876	15
-8	1.00254	0.050202	12	0.980575	0.035298	14	0.991734	0.026912	14	0.995873	0.032366	15
-6	0.97604	0.04301	12	0.998695	0.029885	14	1.0058	0.03484	14	1.04266	0.03841	15
-4	0.972072	0.039463	12	1.03004	0.046488	14	1.00403	0.033484	14	1.01847	0.035036	15
-2	1.03622	0.063057	12	0.997589	0.029487	14	0.996466	0.041109	13	0.964358	0.033699	15
0	1.31996	0.092464	12	1.16995	0.081109	14	1.18475	0.075937	14	1.33227	0.12985	15
2	1.3691	0.098244	12	1.21956	0.074248	14	1.1767	0.063653	14	1.41294	0.152352	15
4	1.40602	0.086478	12	1.23628	0.073412	14	1.18166	0.066257	14	1.42453	0.178579	15
6	1.40812	0.083597	12	1.30416	0.07375	14	1.23762	0.066308	14	1.49993	0.183883	15
8	1.38794	0.077512	12	1.28245	0.069654	14	1.22268	0.068845	14	1.45446	0.165134	15
10	1.41604	0.091431	12	1.32737	0.081355	14	1.22535	0.07124	14	1.4259	0.13588	15
12	1.41404	0.083032	12	1.31659	0.065512	14	1.1815	0.066926	14	1.43043	0.138296	15
14	1.44588	0.075473	12	1.33017	0.07065	14	1.15291	0.087722	14	1.41348	0.101816	15
16	1.39544	0.081654	12	1.31448	0.072536	14	1.19901	0.073136	14	1.47047	0.170761	15
18	1.40083	0.082615	12	1.33404	0.071933	14	1.18707	0.08134	14	1.45939	0.132558	15
20	1.42078	0.090292	12	1.30511	0.068648	14	1.16539	0.09502	14	1.43521	0.124361	15
22	1.42994	0.08529	12	1.33807	0.076095	14	1.17009	0.097985	14	1.46516	0.129125	15
24	1.51139	0.08	12	1.37526	0.080828	14	1.14647	0.094266	14	1.46649	0.167138	15
26	1.43156	0.082057	12	1.36308	0.079905	14	1.12431	0.095475	14	1.44151	0.145511	15
28	1.42857	0.08673	12	1.32973	0.073906	14	1.11414	0.105916	14	1.40387	0.132309	15
30	1.43352	0.089353	12	1.34491	0.078264	14	1.02435	0.171449	14	1.41661	0.162711	15
32	1.43317	0.088985	12	1.36753	0.079156	14	1.08131	0.125197	14	1.44223	0.185264	15
34	1.4161	0.096013	12	1.34156	0.080385	14	1.13457	0.103496	14	1.40617	0.138729	15
36	1.42973	0.094059	12	1.32963	0.094992	14	1.09434	0.102832	14	1.44773	0.173958	15
38	1.38413	0.093643	12	1.36391	0.094057	14	1.08542	0.106273	13	1.49593	0.212649	15
40	1.38238	0.099956	12	1.29464	0.077117	14	1.08643	0.108083	14	1.42673	0.170265	15
42	1.40558	0.10363	12	1.29096	0.082602	14	1.06278	0.116112	14	1.31026	0.116595	15
44	1.38473	0.103713	12	1.35657	0.094603	14	1.04367	0.127968	14	1.35381	0.121299	15
46	1.45935	0.096077	12	1.33492	0.103324	14	1.03316	0.124616	14	1.37454	0.133363	15
48	1.40275	0.106852	12	1.34849	0.099207	14	1.05345	0.121821	14	1.4207	0.151755	15
50	1.40155	0.128675	12	1.33862	0.100468	14	0.989385	0.127405	14	1.3104	0.124718	15
52	1.41717	0.126595	12	1.32011	0.108919	14	1.01915	0.120321	14	1.29323	0.127656	15
54	1.36952	0.115431	12	1.33775	0.115011	14	1.00738	0.125721	14	1.39941	0.143195	15
56	1.42296	0.122536	12	1.36401	0.117159	14	1.02748	0.115013	14	1.43583	0.204642	15
58	1.43732	0.121475	12	1.46863	0.247351	14	0.948198	0.188789	14	1.38032	0.166082	14
60	1.46526	0.154926	11	1.33189	0.323008	11	0.984172	0.173503	13	1.34284	0.242225	11
