# Supplementary material for: Reversal of ApoE4-induced recycling block as a novel prevention approach for Alzheimer’s disease
Source: eLife journal article supplement (doi:10.7554/elife.40048), 2018-10-30
Supplement: supp [file elife-40048-supp-v1.zip › elife_poa_e40048_Figure_8_source_data_1.xlsx]

## Sheet: Fig8A
	Control			AD			AD + reelin			4H EMD 87580+AD+Reelin
X	Mean	SEM	N	Mean	SEM	N	Mean	SEM	N	Mean	SEM	N
-23.5	0.902531	0.0734459	6	0.992669	0.0541117	9	1.01423	0.083131	11	0.945676	0.0199361	5
-21.5		0.201678	6	1.00987	0.0567346	9	1.03182	0.0713518	12	0.964964	0.0215598	5
-19.5		0.163091	7	0.96929	0.0430968	8		0.0664527	12	0.961994	0.0199016	5
-17.5	0.954304	0.0443947	9	0.986123	0.0252075	10	0.980729	0.0191171	11	0.965811	0.0259657	5
-15.5	0.979945	0.0303269	9	1.01054	0.0329847	10	0.990845	0.0191832	12	0.97714	0.0266585	5
-13.5	0.987564	0.0278289	9	1.01574	0.037232	10	1.00106	0.021789	12	0.972846	0.0211513	5
-11.5	0.980566	0.0285964	9	1.00441	0.0180216	10	0.999697	0.0170506	12	0.986205	0.0333737	5
-9.5	0.995201	0.0303232	9	0.997445	0.0249181	10	0.989791	0.0386127	12	1.00347	0.0302135	5
-7.5	0.999358	0.0197534	9	1.0025	0.0195315	10	0.999999	0.0170567	12	1.00711	0.0228643	5
-5.5	1.00426	0.0188509	9	1.00842	0.0125677	10	0.995368	0.0174509	12	1.01006	0.0218125	5
-3.5	1.00375	0.0188642	9	1.01046	0.0160329	10	1.01227	0.0174439	12	1.00922	0.0206595	5
-1.5	1.00893	0.0172386	9	1.00429	0.0199795	10	1.03561	0.0180864	12	1.00986	0.026902	5
0.5	1.21815	0.0584558	9	1.06615	0.0526124	10	1.16721	0.0409126	12	1.21313	0.05059	5
2.5	1.38353	0.0985747	9	1.15156	0.0579307	10	1.38551	0.0581097	12	1.39231	0.0670801	5
4.5	1.39083	0.0894704	9	1.15862	0.0550703	10	1.42999	0.0626684	12	1.40413	0.0788574	5
6.5	1.42669	0.0876708	9	1.15073	0.0510196	10	1.37174	0.0591183	12	1.44983	0.0677629	5
8.5	1.44384	0.0846046	9	1.14459	0.0515383	10	1.38172	0.0576376	12	1.45429	0.0629033	5
10.5	1.43025	0.0808073	9	1.13398	0.0520857	10	1.35892	0.0545327	12	1.42516	0.0576299	5
12.5	1.44514	0.0822678	9	1.13865	0.0503208	10	1.35559	0.0545676	12	1.4314	0.0608872	5
14.5	1.42872	0.0800626	9	1.13484	0.0478095	10	1.33899	0.0506715	12	1.39781	0.0557385	5
16.5	1.4356	0.0786015	9	1.12111	0.0537764	10	1.39007	0.0537905	10	1.41723	0.0532497	5
18.5	1.42844	0.0752016	9	1.09641	0.0582299	10	1.35119	0.0611622	10	1.42312	0.0456378	5
20.5	1.41383	0.0673559	9	1.10912	0.0534435	10	1.34641	0.0515667	10	1.41918	0.0508244	5
22.5	1.42776	0.0745391	9	1.09785	0.0566237	10	1.35786	0.0455007	10	1.40703	0.03763	5
24.5	1.39764	0.070666	9	1.08759	0.0538047	10	1.31995	0.048854	10	1.36817	0.0499487	5
26.5	1.38962	0.0805039	9	1.04056	0.0597773	10	1.34227	0.0408613	10	1.39921	0.0502481	5
28.5	1.38356	0.0736081	9	1.04791	0.063834	10	1.32498	0.0408017	10	1.40119	0.0542208	5
30.5	1.36529	0.0704535	9	1.04349	0.0577342	10	1.31728	0.0423305	10	1.37974	0.0420494	5
32.5	1.35054	0.0688021	9	1.04611	0.0577076	10	1.2909	0.0367948	10	1.34984	0.0467369	5
34.5	1.33455	0.0737476	9	1.02906	0.0556083	10	1.24823	0.0403365	10	1.34761	0.0467808	5
36.5	1.32804	0.0706388	9	1.01714	0.0549804	10	1.26507	0.0413669	10	1.35133	0.0560901	5
38.5	1.3078	0.0708789	9	1.01002	0.0580951	10	1.24864	0.0331732	10	1.32454	0.0488792	5
40.5	1.29396	0.0785751	9	1.03264	0.0562981	10	1.24674	0.0383968	10	1.33493	0.0433586	5
42.5	1.27376	0.072915	9	1.04118	0.0530328	9	1.23129	0.0297746	10	1.3453	0.043909	5
44.5	1.2817	0.0783801	9	1.04657	0.0520755	9	1.22959	0.0291795	10	1.33699	0.043509	5
46.5	1.26276	0.0765113	9	1.04208	0.0526703	9	1.19347	0.029373	10	1.33209	0.0456161	5
48.5	1.26314	0.0799152	9	1.03233	0.0573432	9	1.20673	0.0300224	10	1.32719	0.0479275	5
50.5	1.24461	0.0807959	9	1.02407	0.0589545	9	1.18621	0.0282187	10	1.32228	0.0504153	5
52.5	1.22189	0.0801758	9	1.01987	0.0623448	9	1.1653	0.0290383	10	1.31738	0.0530546	5
54.5	1.21692	0.0831701	9	1.01443	0.0621565	9	1.16762	0.0256426	10	1.31248	0.0558239	5
56.5	1.22288	0.0828455	9	0.9945	0.0669546	9	1.15781	0.0287006	10	1.30758	0.0587049	5
58.5	1.1822	0.0874868	9	0.98502	0.0684399	9	1.13481	0.0292214	10	1.30268	0.0616818	5

## Sheet: Fig8B
	Control			AD			Reelin+AD			Reelin +AD+4 Hr EMD87580
X	Mean	SEM	N	Mean	SEM	N	Mean	SEM	N	Mean	SEM	N
-49	0.57764	0.169654	3	0.926329	0.0795795	5	0.821404	0.127133	6	1.0869		1
-47	0.97066	0.251612	3	0.925493	0.0781464	5	0.816915	0.0712323	8	0.7124	0.0988	4
-45	0.631177	0.125164	3	0.904099	0.0655341	6	0.703765	0.0707503	9	0.9365	0.19	5
-43	0.624886	0.10648	3	0.916366	0.0784172	6	0.975566	0.1124	13	0.9849	0.1743	7
-41	0.678509	0.147671	3	0.971	0.0640189	6	0.873327	0.0398209	14	1.0566	0.1961	8
-39	0.899316	0.226209	5	0.885471	0.0451861	7	0.873725	0.0401828	17	0.9553	0.1364	9
-37	0.548798	0.170621	6	0.879853	0.0394555	7	0.871722	0.0402812	19	0.8893	0.0955	12
-35	0.829603	0.0915883	6	0.879078	0.0383629	7	0.962209	0.0516804	22	0.8825	0.0942	14
-33	0.813223	0.070514	6	0.881055	0.0452615	7	0.907764	0.0474664	22	0.826	0.0801	17
-31	0.845427	0.0682854	7	1.02487	0.111835	7	0.930991	0.0306258	25	0.8803	0.0596	17
-29	0.862474	0.0580553	7	0.948804	0.0359698	7	1.02329	0.0783833	27	0.7377	0.1872	17
-27	0.833519	0.0655991	7	0.945594	0.0217396	7	0.960717	0.0246431	26	0.8763	0.0381	20
-25	0.944244	0.0730158	11	0.970796	0.0153038	8	0.947389	0.0273744	27	0.8862	0.0191	21
-23	0.892474	0.0261613	13	0.964727	0.0256222	8	0.931224	0.0241987	28	0.8678	0.0228	20
-21	0.964796	0.0280554	14	0.987654	0.013584	8	0.935265	0.0203542	28	0.91	0.0268	21
-19	0.969141	0.0318493	19	0.98662	0.0173856	9	0.976229	0.0132552	28	0.9771	0.0373	22
-17	0.970345	0.0174887	19	0.986455	0.0216547	9	0.964488	0.0200803	27	0.933	0.0145	22
-15	0.963903	0.00984482	19		0.106255	9	0.985698	0.0131075	28	0.9515	0.0134	22
-13	0.986719	0.0133678	19	1.0049	0.022312	9	0.975493	0.0143485	28	0.9919	0.0124	22
-11		0.0426258	19	1.03302	0.0177618	9	0.984107	0.015186	28	1.0074	0.015	22
-9	0.985417	0.0100967	19	1.00206	0.0140804	9	0.977111	0.0102147	28	0.9851	0.013	22
-7	1.00283	0.00746761	19	1.04317	0.0154511	9	0.998337	0.00805331	28	1.017	0.015	22
-5	0.992198	0.00713745	19	0.994015	0.0150672	9	1.00452	0.0103402	28	1.015	0.012	22
-3		0.0461381	19	1.02532	0.0131425	9	0.990477	0.00973998	28	1.0001	0.018	22
-1	1.01411	0.0100545	19	1.00122	0.015528	9	1.01279	0.0121208	28	1.0645	0.0191	22
1.5	1.3601	0.0436269	19	1.10384	0.0512216	9	1.18594	0.0389067	28	1.3171	0.0639	22
3.5	1.39918	0.0530053	19	1.1206	0.0588926	9	1.20304	0.0332256	28	1.3144	0.054	22
5.5	1.45083	0.0506012	19	1.13631	0.0494881	9	1.21716	0.0325638	28	1.3875	0.0574	22
7.5	1.47713	0.0540133	19	1.20957	0.0509967	9	1.24006	0.0358939	28	1.4125	0.0412	22
9.5	1.48654	0.0576928	19	1.17548	0.0320801	9	1.25018	0.0355595	28	1.4582	0.0508	22
11.5	1.47542	0.0587299	19	1.2012	0.038678	9	1.24316	0.0333542	28	1.4728	0.0624	22
13.5	1.47222	0.056443	19	1.15565	0.0325062	9	1.25026	0.0337361	28	1.4719	0.0589	22
15.5	1.45536	0.0487055	19	1.15836	0.0353953	9	1.25357	0.0327822	28	1.4394	0.0454	22
17.5	1.4661	0.0505002	19	1.1323	0.0207613	9	1.24364	0.0343323	28	1.4511	0.058	22
19.5	1.44846	0.051802	19	1.13029	0.0299425	9	1.2459	0.0350653	28	1.4387	0.063	22
21.5	1.45358	0.046282	19	1.11627	0.028009	9	1.22444	0.0312752	28	1.3918	0.0491	22
23.5	1.42476	0.0486691	19	1.13896	0.0291274	9	1.22246	0.0302912	28	1.3782	0.0451	22
25.5	1.42357	0.0523463	19	1.12068	0.0177832	9	1.23072	0.0277377	28	1.3899	0.0601	22
27.5	1.39823	0.0469276	19	1.10044	0.0271678	9	1.22732	0.0330365	28	1.369	0.0462	22
29.5	1.39431	0.0466811	19	1.11919	0.0347109	9	1.20335	0.0290139	28	1.396	0.0605	22
31.5	1.38099	0.0488344	19	1.11087	0.0324717	9	1.20608	0.0286075	28	1.3464	0.0447	22
33.5	1.40186	0.0475907	19	1.10634	0.0330123	9	1.17882	0.0284304	28	1.3556	0.043	22
35.5	1.36575	0.0494747	19	1.05204	0.0316788	9	1.17499	0.0308406	28	1.3739	0.0621	22
37.5	1.38823	0.0448503	19	1.05411	0.0444843	9	1.17192	0.0311911	28	1.3633	0.05	22
39.5	1.36037	0.04931	19	1.10193	0.0473933	9	1.13041	0.0282657	28	1.3412	0.0465	22
41.5	1.34533	0.0465022	19	1.05382	0.051516	9	1.14748	0.0294667	28	1.3561	0.0571	22
43.5	1.36288	0.0441268	19	1.05929	0.0374455	9	1.16013	0.0265006	28	1.3555	0.0592	22
45.5	1.3283	0.0469708	19	1.05663	0.0415201	9	1.14545	0.0272338	28	1.3564	0.0564	22
47.5	1.33289	0.0489002	19	1.04691	0.0470667	9	1.1417	0.0265619	28	1.3406	0.063	22
49.5	1.33706	0.0461908	19	1.00686	0.0408392	9	1.13381	0.0274705	28	1.3483	0.0568	22
51.5	1.32606	0.04756	19	1.04434	0.0367579	9	1.1293	0.0279184	28	1.3528	0.0613	22
53.5	1.31373	0.0456969	19	1.04585	0.0516046	9	1.13615	0.0277865	28	1.3311	0.0635	22
55.5	1.29626	0.0460192	19	1.04604	0.0526247	9	1.09982	0.0267018	28	1.3292	0.0637	22
57.5	1.30156	0.0462308	19	1.04913	0.0408201	9	1.09664	0.0283638	28	1.3308	0.0651	22
59.5	1.29098	0.0444961	19	1.03744	0.0469741	9	1.09493	0.0281014	28	1.3138	0.0689	22

## Sheet: Fig8C
	Control			AD			Reelin+AD			Reelin +AD+4H EMD87580
X	Mean	SEM	N	Mean	SEM	N	Mean	SEM	N	Mean	SEM	N
32.5	1.35054	0.0688021	9	1.04611	0.0577076	10	1.2909	0.0367948	10	1.34984	0.0467369	5

## Sheet: Fig8D
	Control			AD			Reelin+AD			Reelin +AD+4 Hr EMD87580
X	Mean	SEM	N	Mean	SEM	N	Mean	SEM	N	Mean	SEM	N
41.5	1.34533	0.0465022	19	1.05382	0.051516	9	1.14748	0.0294667	28	1.3561	0.0571	22
